# Supplementary material
Source: ML conference proceedings conference paper supplement (https://openaccess.thecvf.com/content/CVPR2026/html/Le_VisiLock_Authorizing_Instruction-based_CVPR_2026_paper.html)

Final Turn - CLIP-I

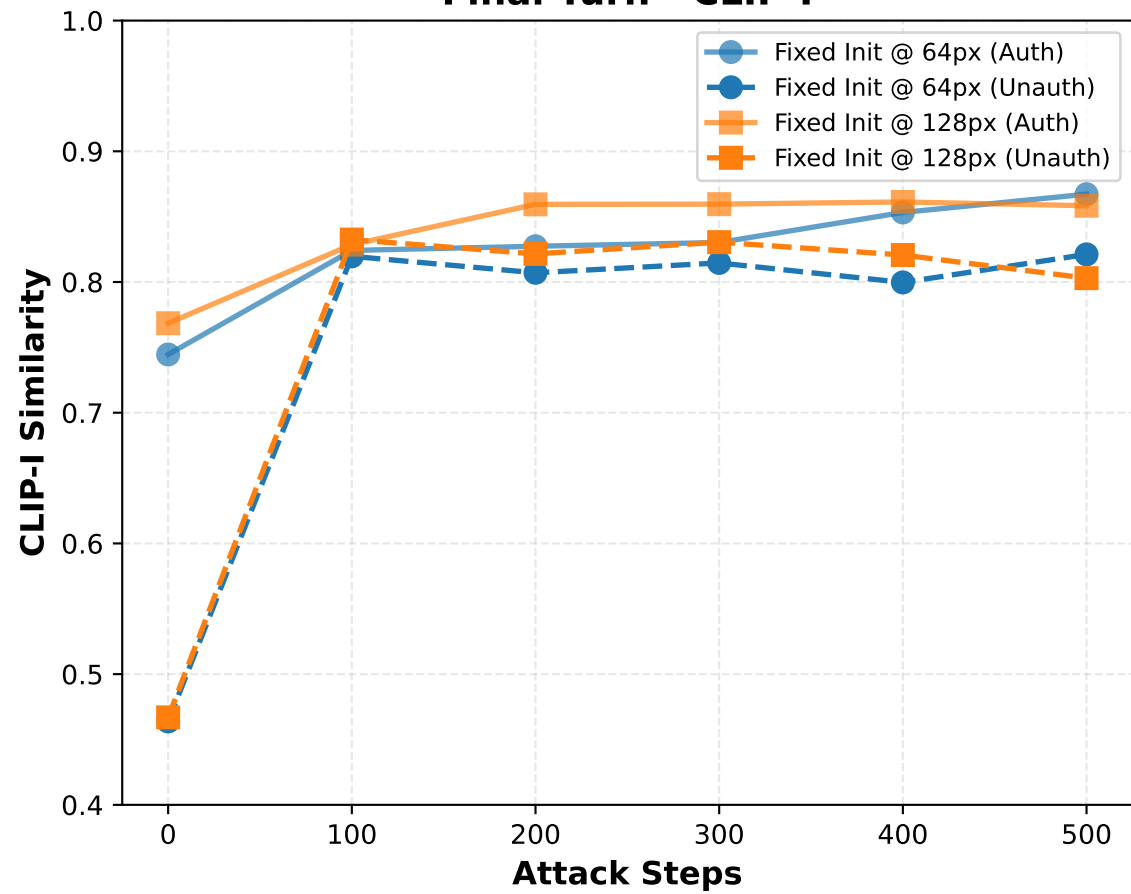

Final Turn - CLIP-T

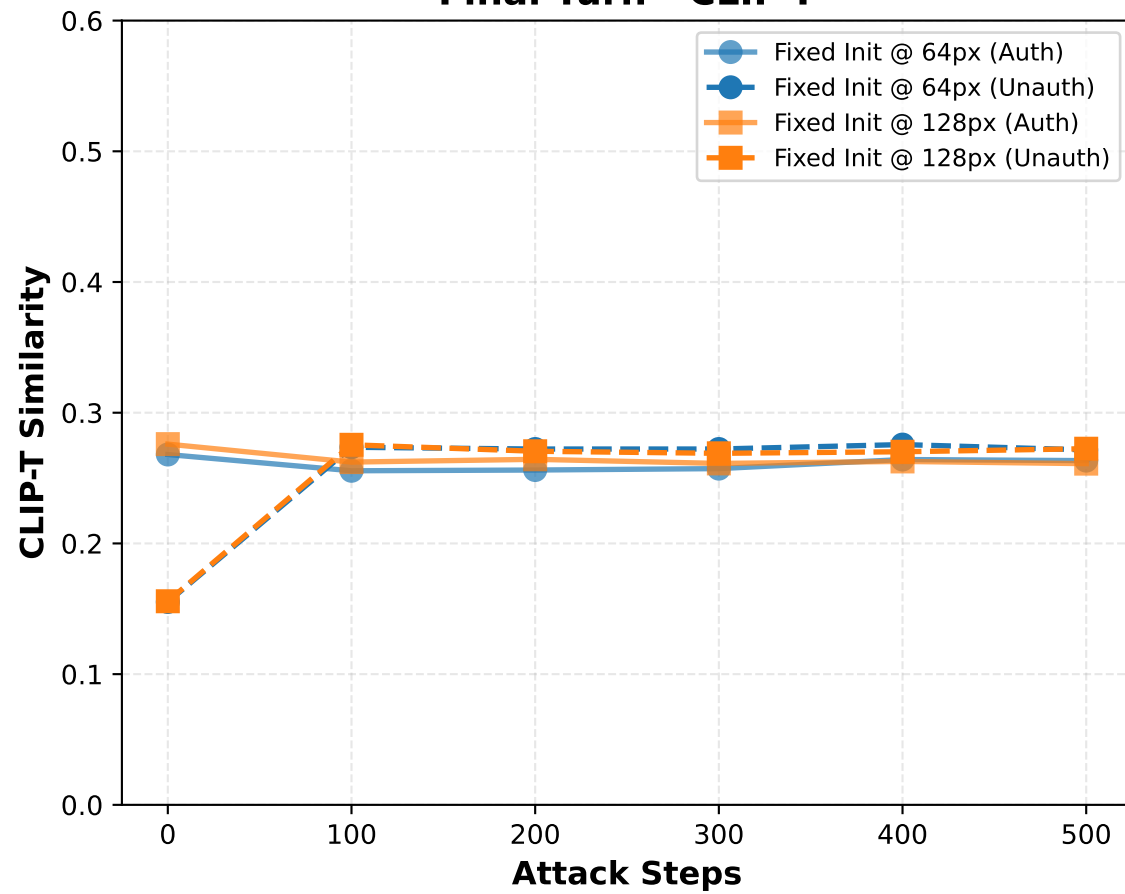

Final Turn - DINO

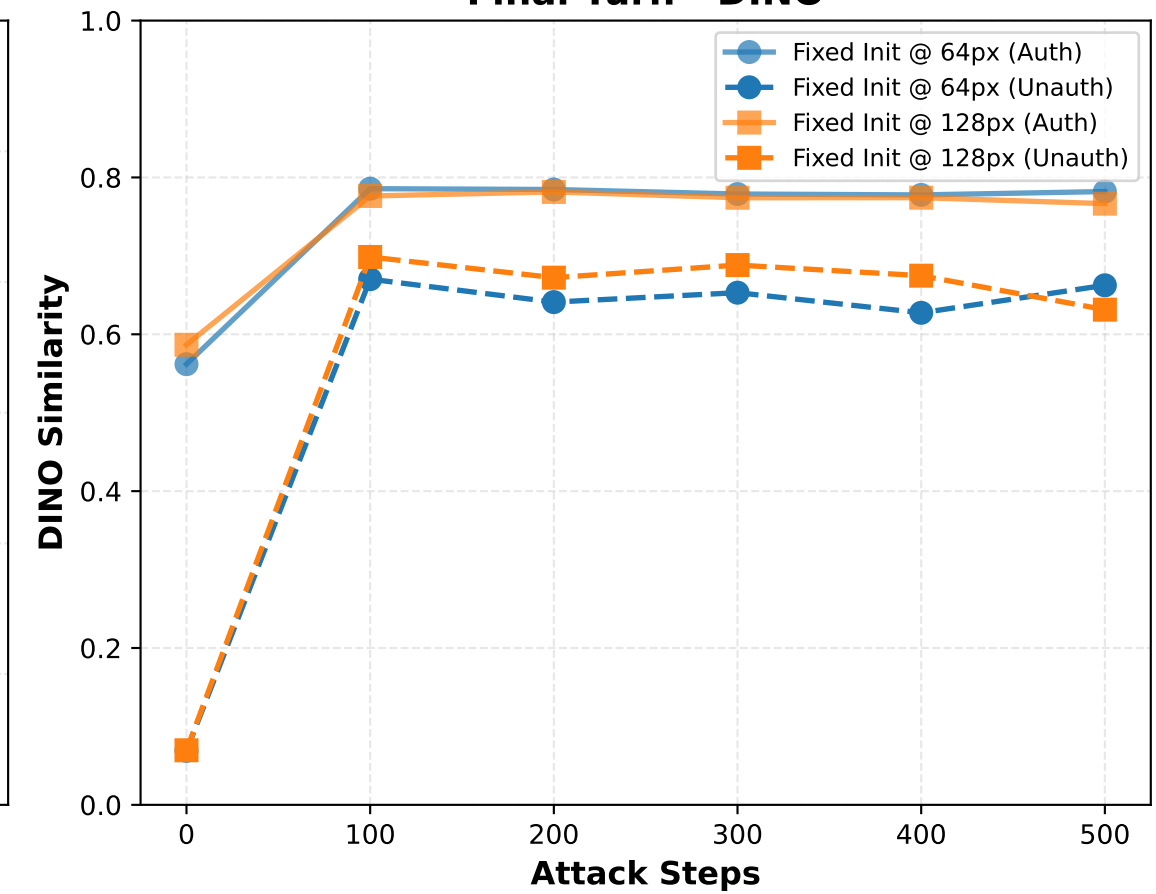

All Turns - CLIP-I

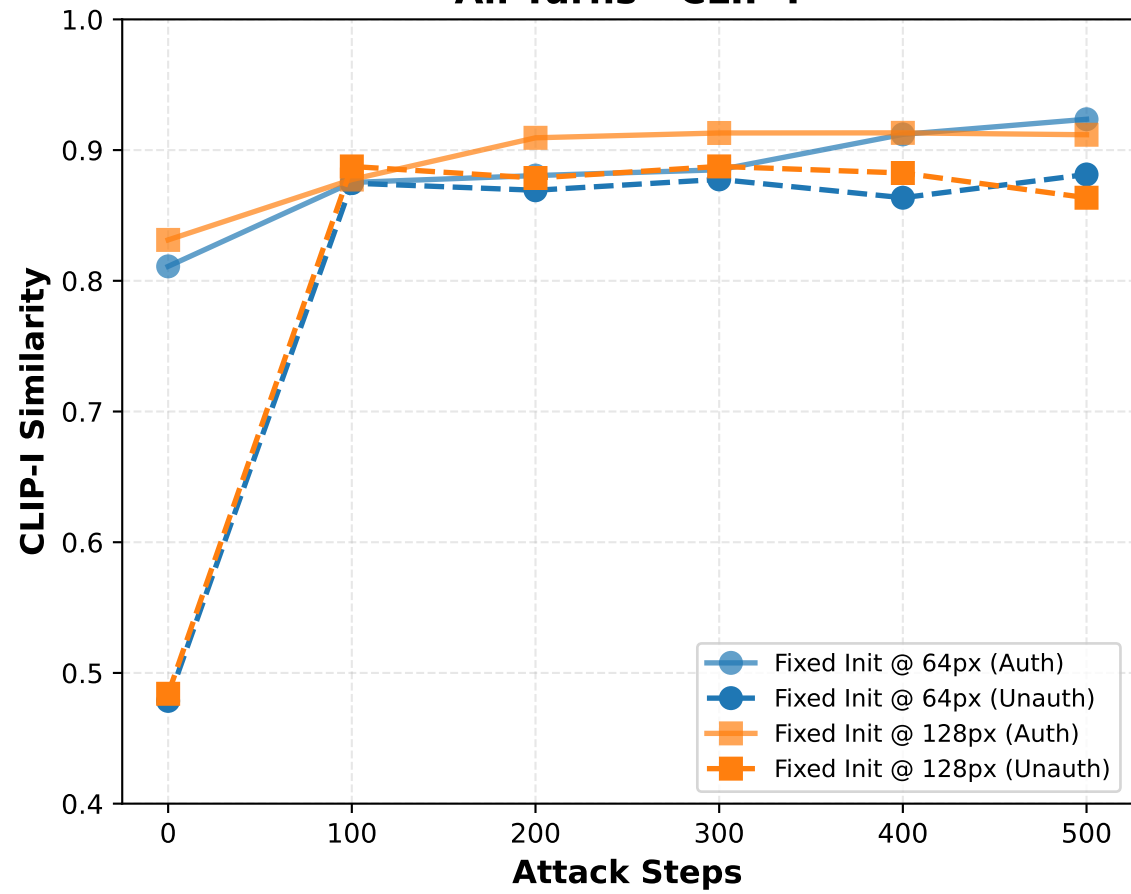

All Turns - CLIP-T

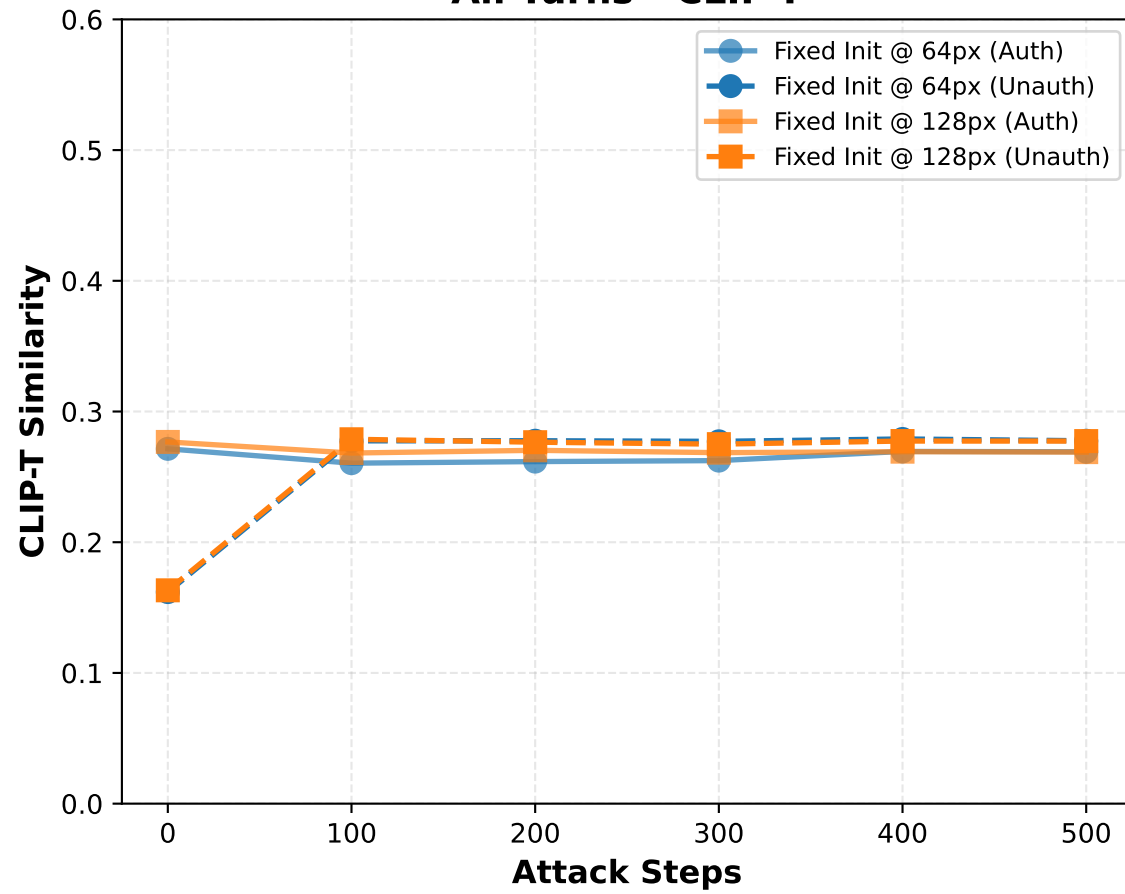

All Turns - DINO

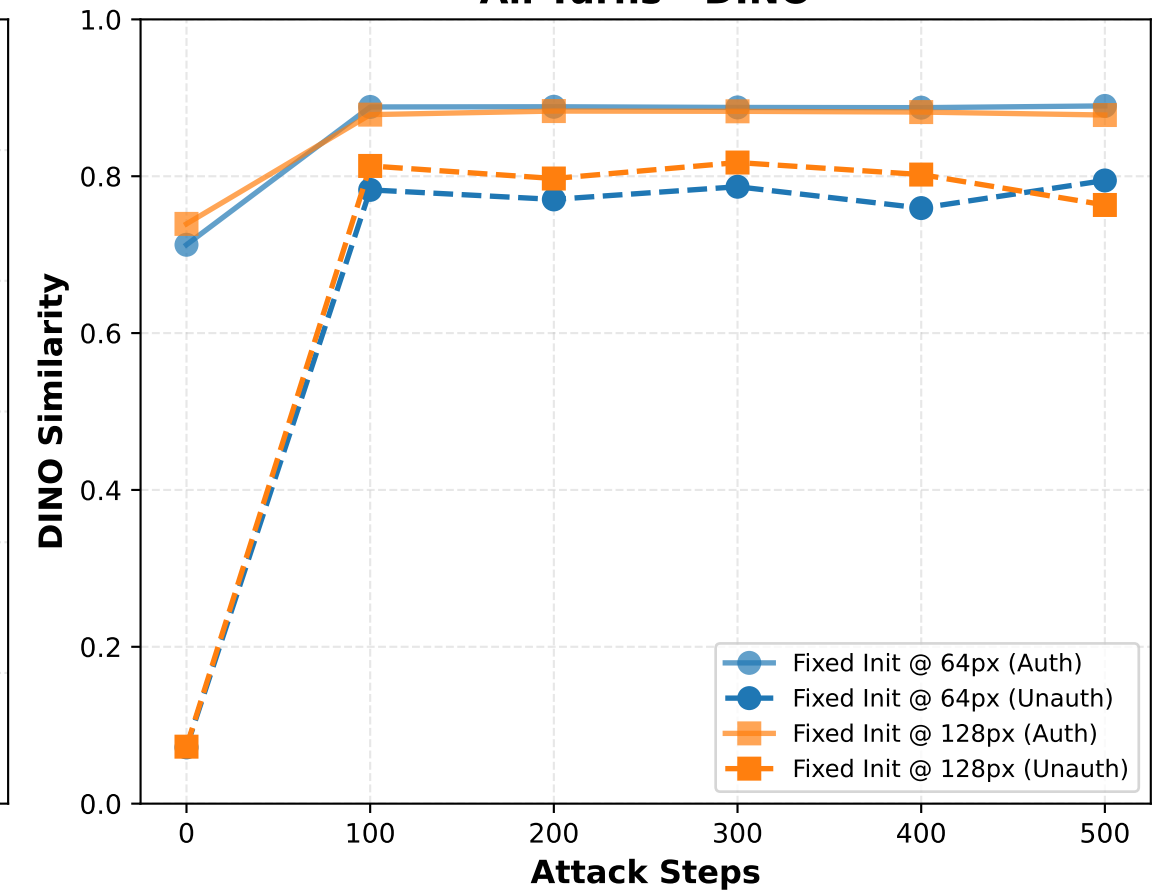

Supplement: Supplementary file 1 [file adversarial_attack_trajectory.pdf › supp/experiments/master_runs_nano_banana_unlock_studentfrombadteacher/adversarial_attack_trajectory.pdf]

**All Turns - CLIP-I**

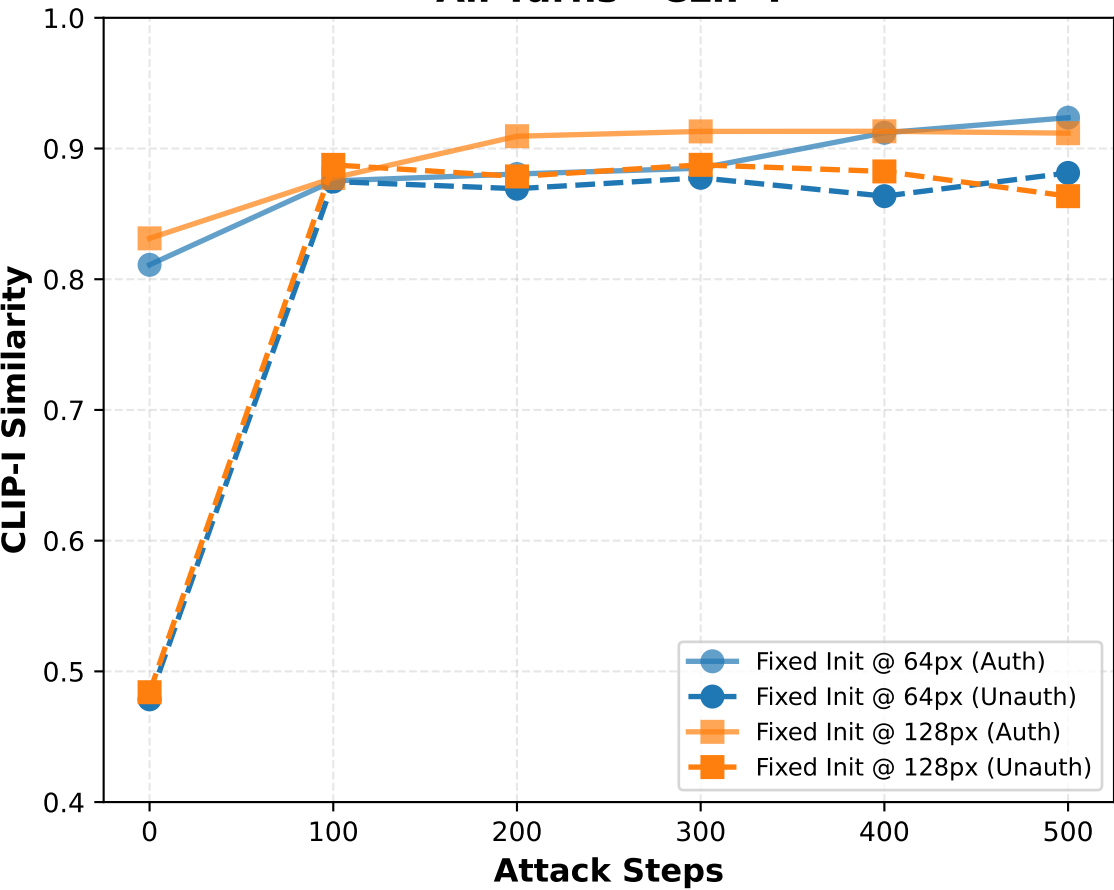

Supplement: Supplementary file 2 [file attack_all_turn_clipi.pdf › supp/experiments/master_runs_nano_banana_unlock_studentfrombadteacher/attack_all_turn_clipi.pdf]

# All Turns - CLIP-T

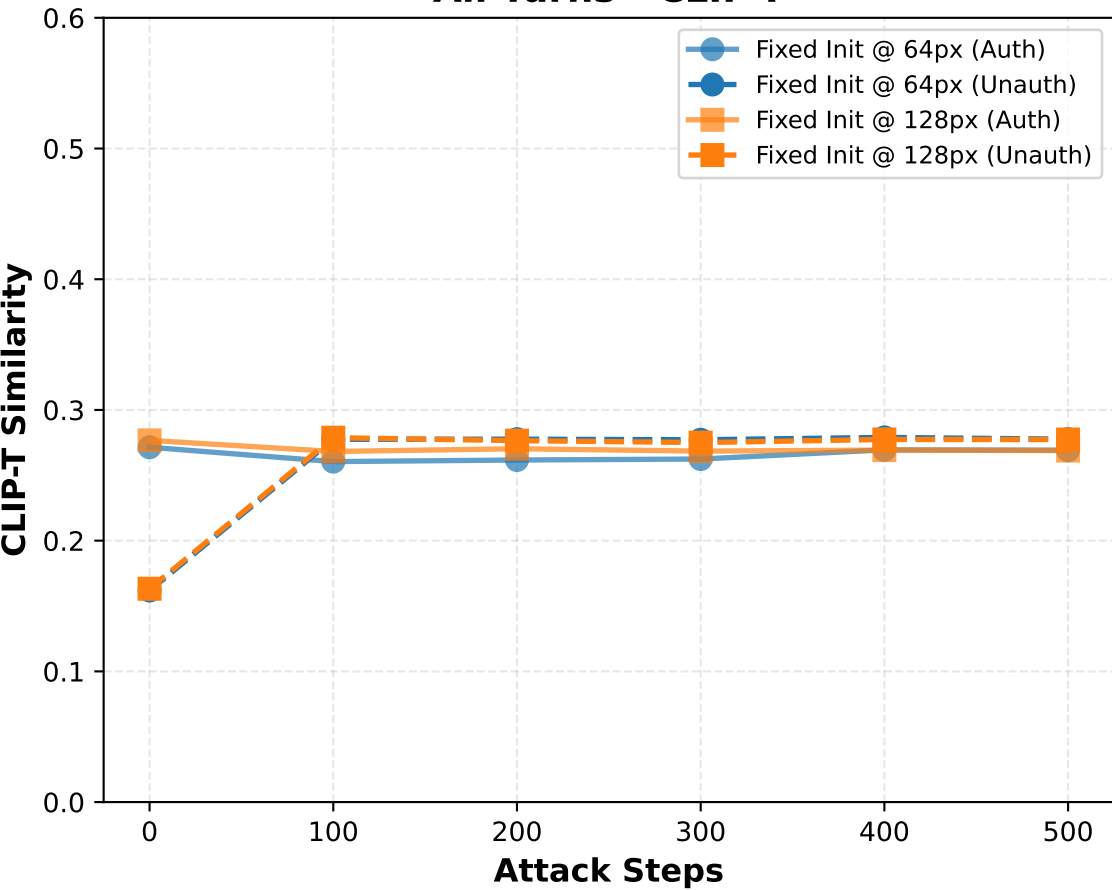

Supplement: Supplementary file 3 [file attack_all_turn_clipt.pdf › supp/experiments/master_runs_nano_banana_unlock_studentfrombadteacher/attack_all_turn_clipt.pdf]

# All Turns - DINO

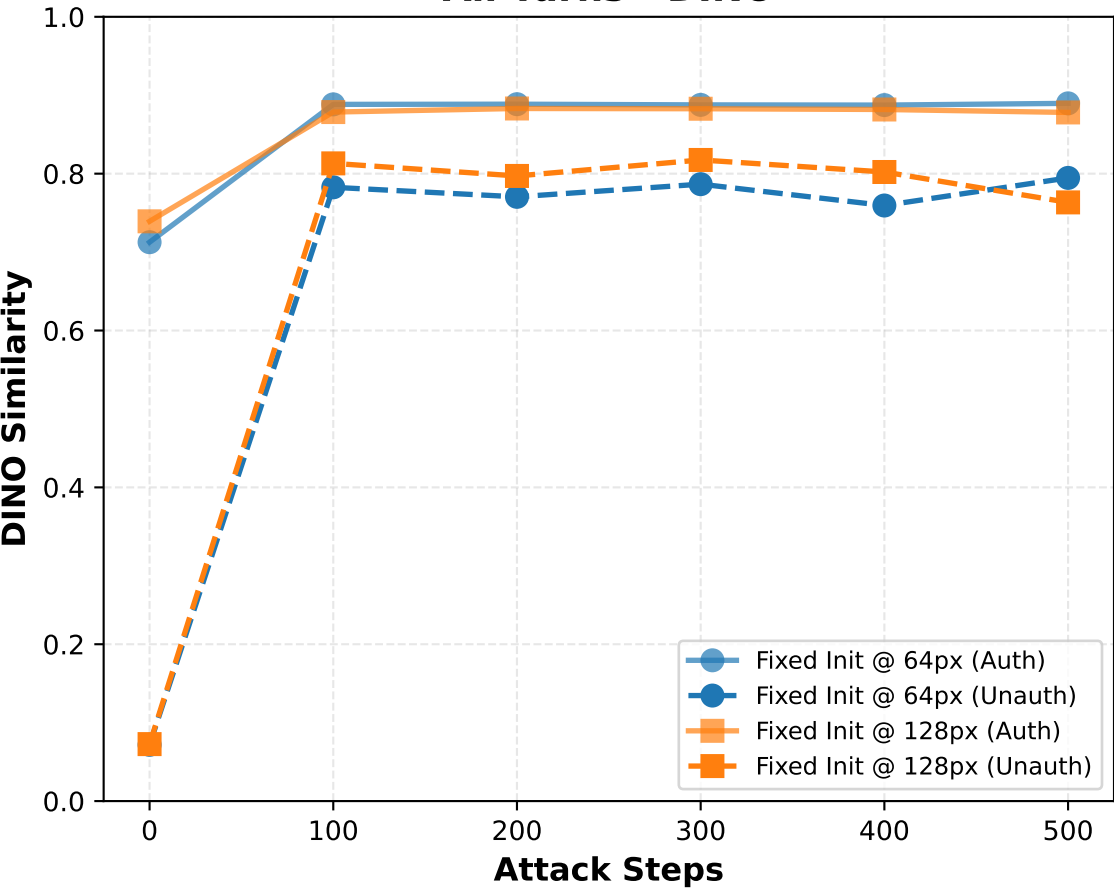

Supplement: Supplementary file 4 [file attack_all_turn_dino.pdf › supp/experiments/master_runs_nano_banana_unlock_studentfrombadteacher/attack_all_turn_dino.pdf]

# All Turns - CLIP-I

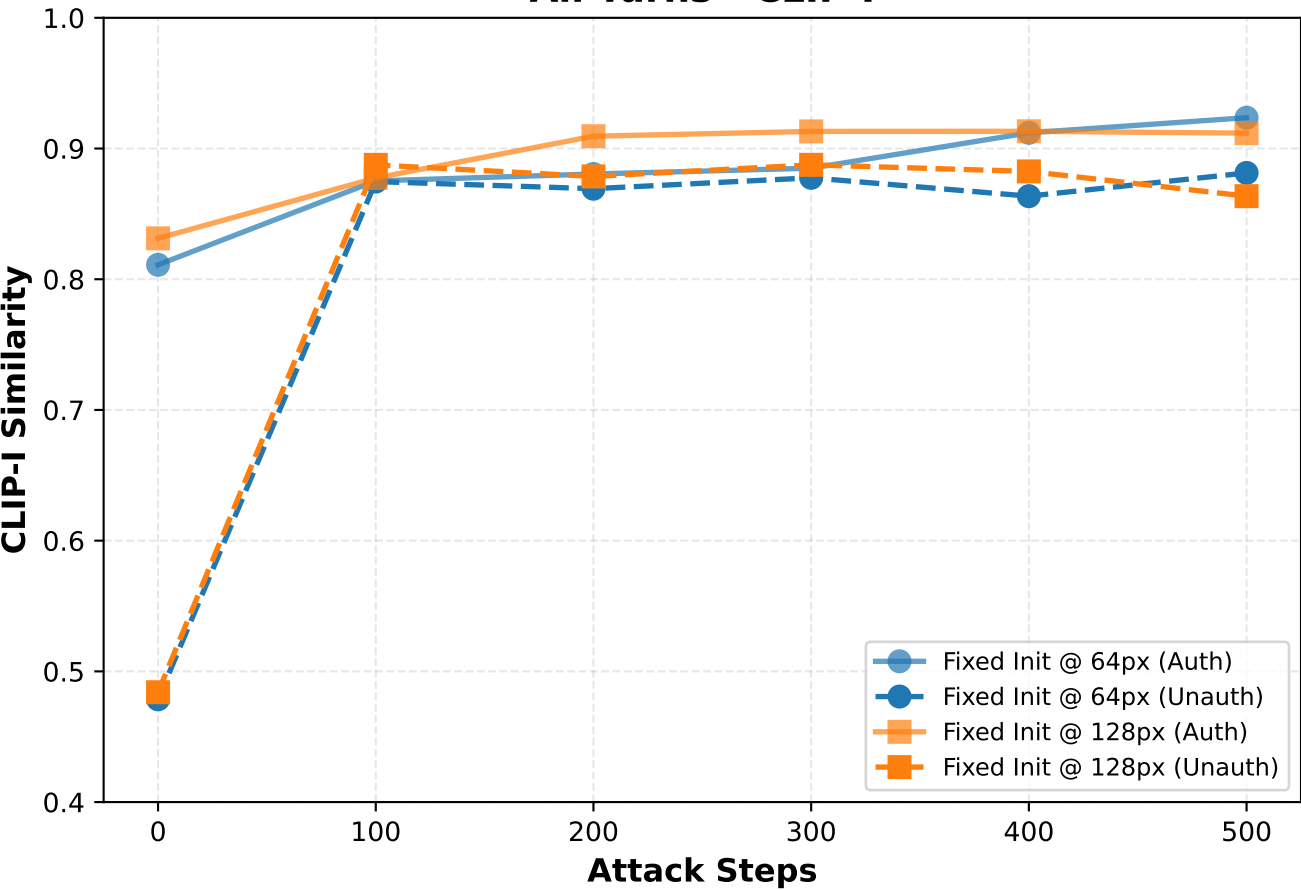

Supplement: Supplementary file 5 [file attack_all_turns_clipi.pdf › supp/experiments/master_runs_nano_banana_unlock_studentfrombadteacher/attack_all_turns_clipi.pdf]

# All Turns - DINO

DINO Similarity

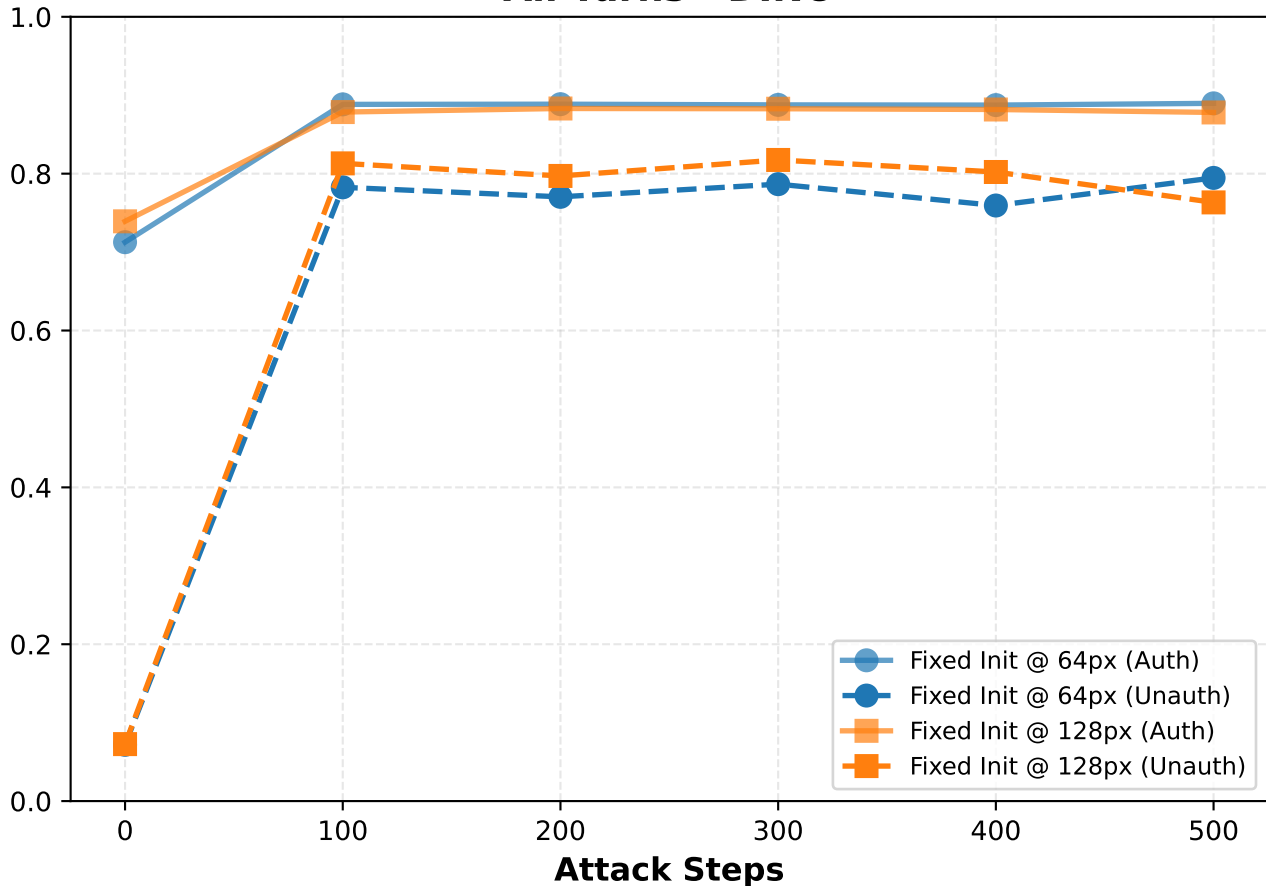

Supplement: Supplementary file 6 [file attack_all_turns_dino.pdf › supp/experiments/master_runs_nano_banana_unlock_studentfrombadteacher/attack_all_turns_dino.pdf]

# Final Turn - CLIP-I

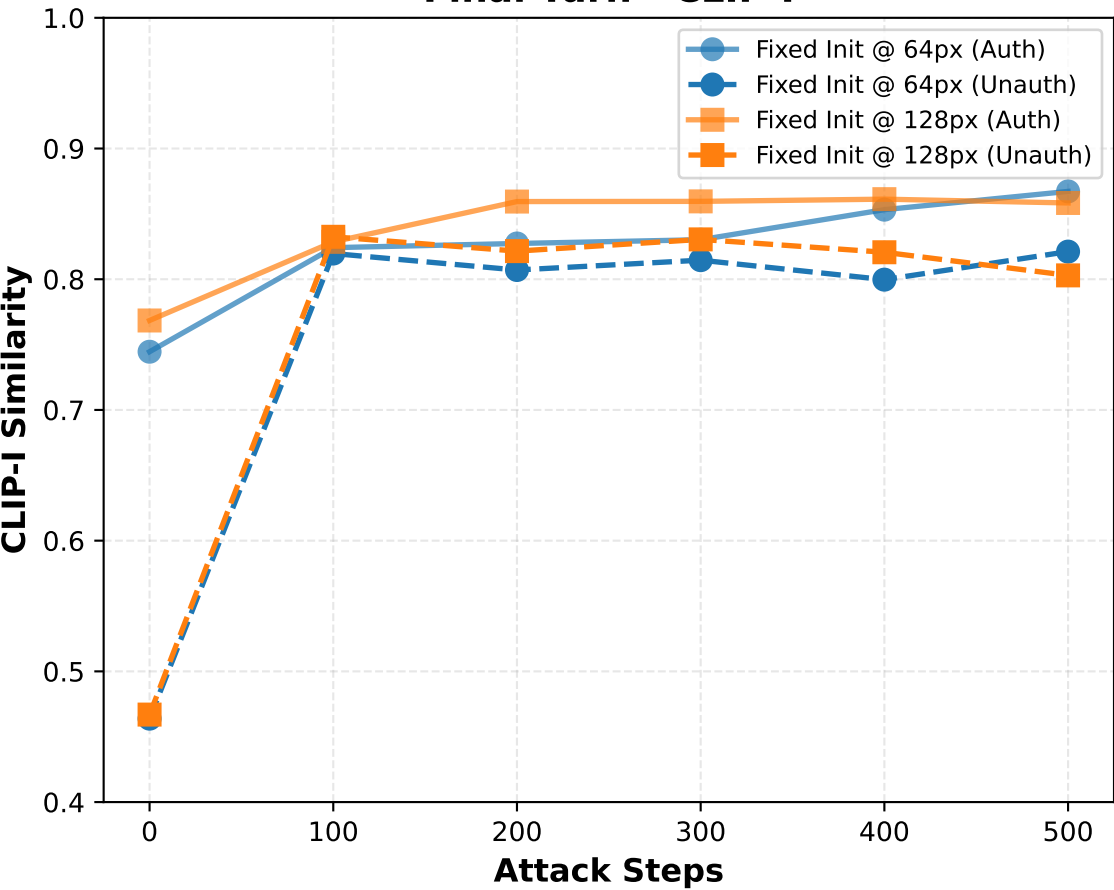

Supplement: Supplementary file 7 [file attack_final_turn_clipi.pdf › supp/experiments/master_runs_nano_banana_unlock_studentfrombadteacher/attack_final_turn_clipi.pdf]

# Final Turn - CLIP-T

CLIP-T Similarity

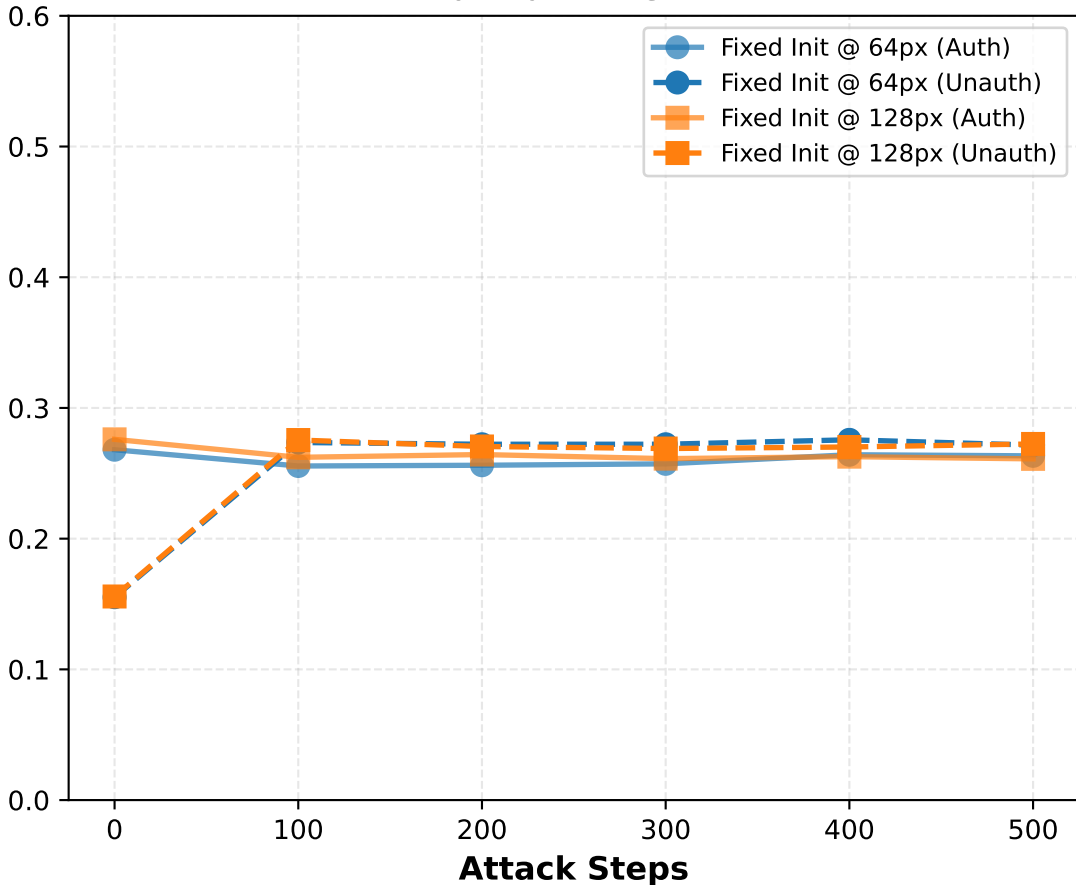

Supplement: Supplementary file 8 [file attack_final_turn_clipt.pdf › supp/experiments/master_runs_nano_banana_unlock_studentfrombadteacher/attack_final_turn_clipt.pdf]

# Final Turn - DINO

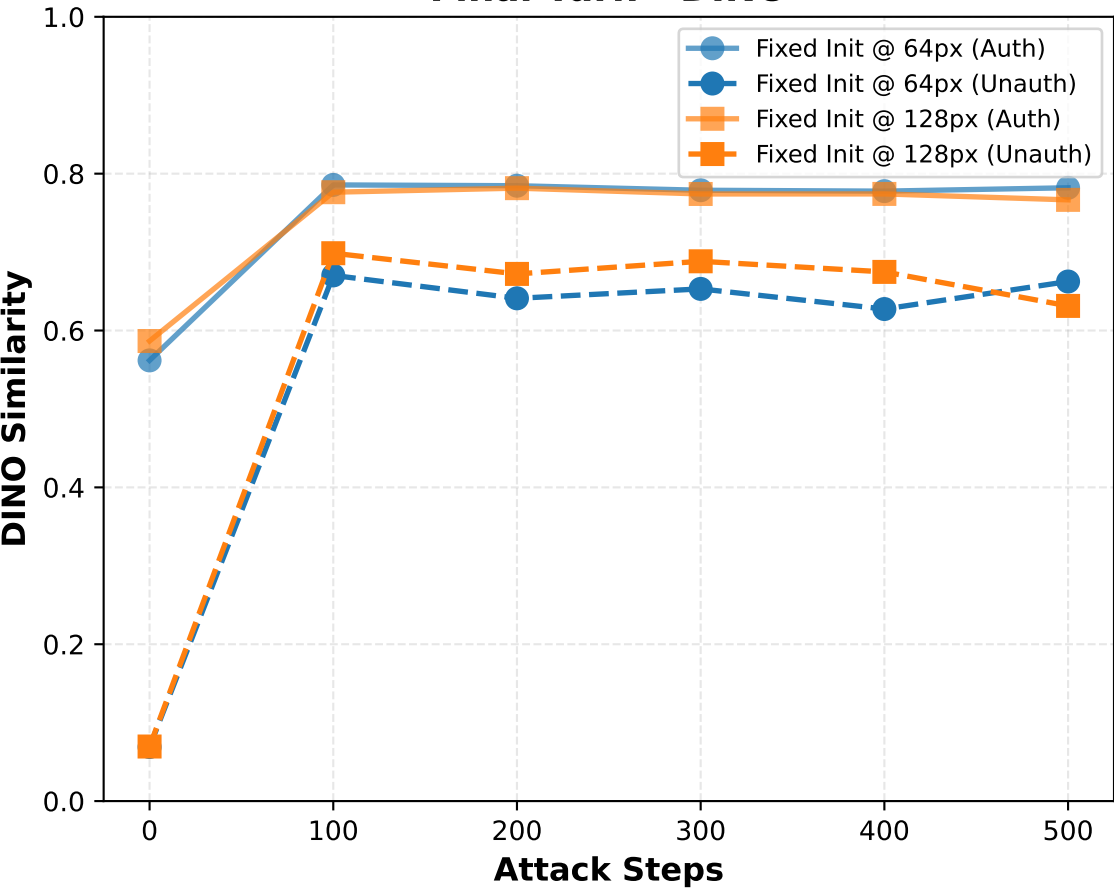

Supplement: Supplementary file 9 [file attack_final_turn_dino.pdf › supp/experiments/master_runs_nano_banana_unlock_studentfrombadteacher/attack_final_turn_dino.pdf]
